# Supplementary material
Source: Springer Nature journal article supplement (https://www.springermedizin.de/resource/supplementary/12885_2009_1740_MOESM1_ESM.pdf/9472816)

**A**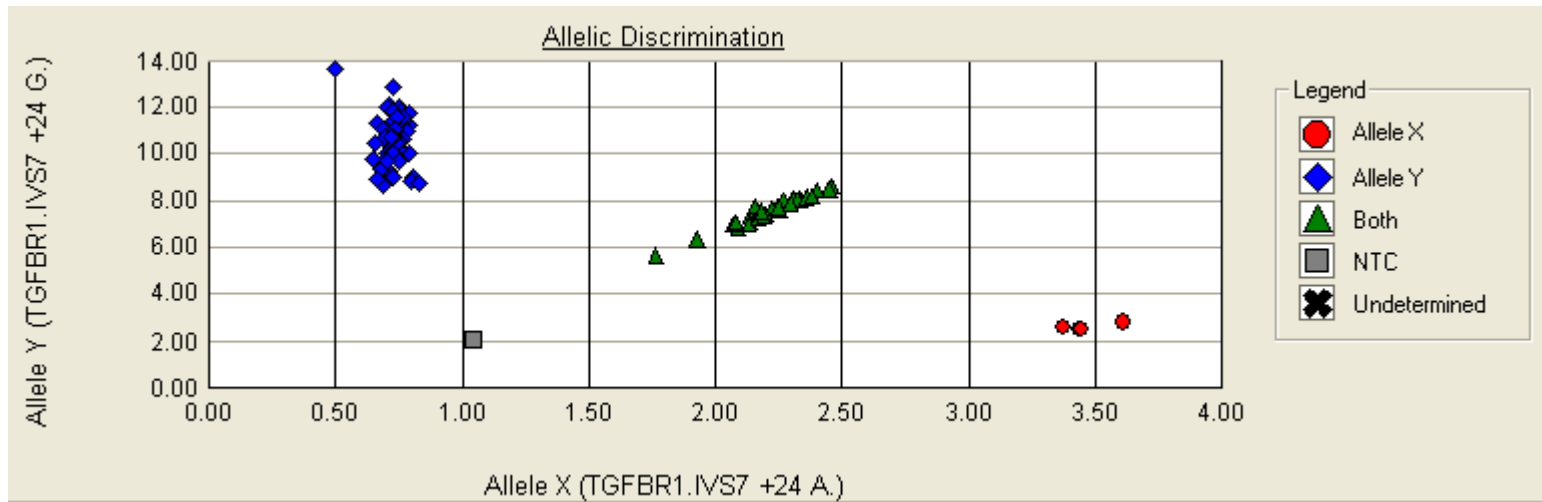**B**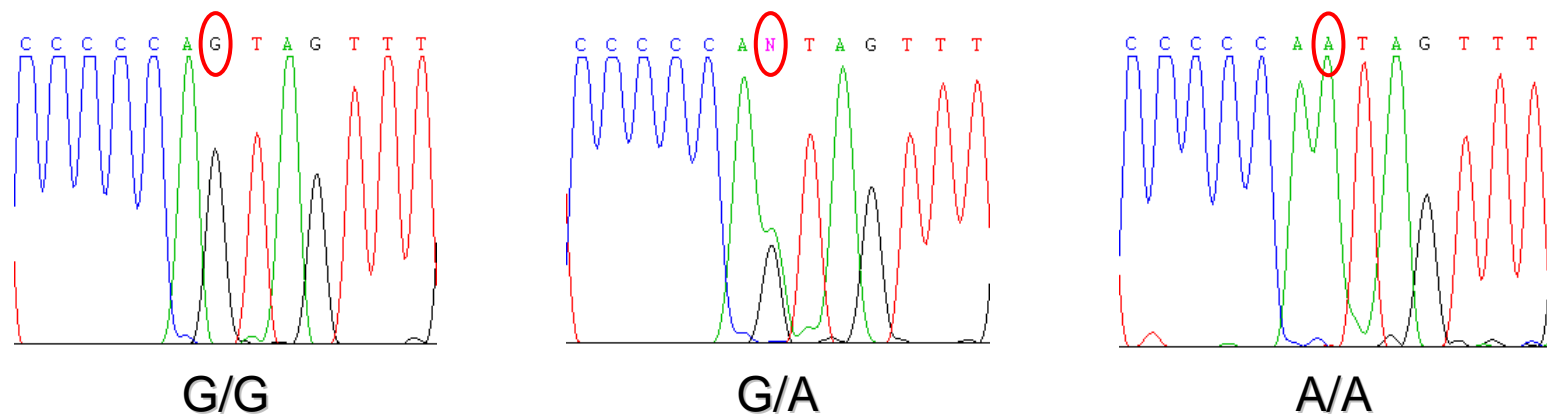

Supplement: MOESM1 [file 9472816]
